# Supplementary material for: Eight new freshwater mussels (Unionidae) from tropical Asia
Source: PubMed Central journal article supplement (PMC6700347; doi:10.1038/s41598-019-48528-z), 2019-08-19
Supplement: 41598_2019_48528_MOESM1_ESM.pdf [file 41598_2019_48528_MOESM1_ESM.pdf]

# Eight new freshwater mussels (Unionidae) from tropical Asia

Ivan N. Bolotov, Ekaterina S. Konopleva, Ilya V. Vikhrev, Manuel Lopes-Lima, Arthur E. Bogan, Zau Lunn, Nyein Chan, Than Win, Olga V. Aksenova, Mikhail Yu. Gofarov, Alena A. Tomilova & Alexander V. Kondakov

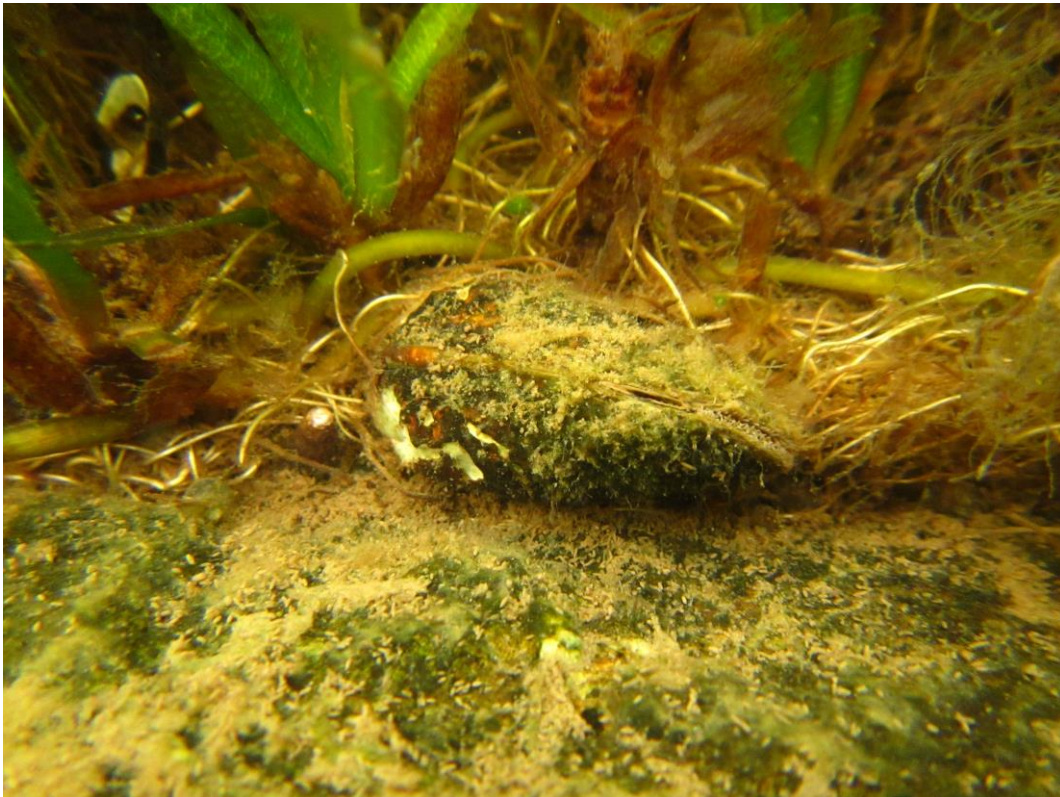

*Radiatula myitkyinae* (Prashad, 1930) on basalt outcrop in Lake Indawgyi (Photo: Ivan N. Bolotov)

**Supplementary Table 1.** List of sequences used in this study, including the species, locality and NCBI's GenBank accession numbers

| Species                                                               | Locality                                                      | Specimen Voucher | COI      | 16S rRNA | 28S rRNA |
|-----------------------------------------------------------------------|---------------------------------------------------------------|------------------|----------|----------|----------|
| <b>UNIONIDAE Rafinesque, 1820</b>                                     |                                                               |                  |          |          |          |
| <b>PARREYSIINAE Henderson 1935</b>                                    |                                                               |                  |          |          |          |
| <b>Indochinellini Bolotov, Pfeifer, Vikhrev &amp; Konopleva, 2018</b> |                                                               |                  |          |          |          |
| <i>Indochinella pugio pugio</i> (Benson, 1862)                        | Myanmar: Ayeyarwady River basin, Lake Nant Phar               | RMBH biv_258_1   | MF352261 | MF352325 | MF352386 |
| <i>I. pugio pugio</i> (Benson, 1862)                                  | Myanmar: Ayeyarwady River basin, Lake Nant Phar               | RMBH biv_258_2   | MF352262 | MF352326 | MF352389 |
| <i>I. pugio pugio</i> (Benson, 1862)                                  | Myanmar: Ayeyarwady River basin, Lake Myaung                  | RMBH biv_268_1   | MF352285 | n/a      | n/a      |
| <i>I. pugio pugio</i> (Benson, 1862)                                  | Myanmar: Ayeyarwady River basin, Lake Myaung                  | RMBH biv_268_2   | MF352286 | MF352346 | MF352403 |
| <i>I. pugio pugio</i> (Benson, 1862)                                  | Myanmar: Ayeyarwady River basin, Lake Myaung                  | RMBH biv_268_4   | MF352287 | MF352347 | MF352404 |
| <i>I. pugio pugio</i> (Benson, 1862)                                  | Myanmar: Ayeyarwady River basin, Chindwin River, Pauk In Lake | UA 20739         | JN243899 | KP795046 | JN243879 |
| <i>I. pugio viridissima</i> <b>ssp. nov.</b>                          | Myanmar: Sittaung River basin, Myit Kyi Pauk stream           | RMBH biv_251_1   | MF352242 | MF352312 | MF352370 |
| <i>I. pugio viridissima</i> <b>ssp. nov.</b>                          | Myanmar: Sittaung River basin, Myit Kyi Pauk stream           | RMBH biv_251_2   | MF352243 | MF352313 | MF352371 |
| <i>I. pugio viridissima</i> <b>ssp. nov.</b>                          | Myanmar: Sittaung River basin, Myit Kyi Pauk stream           | RMBH biv_251_3   | MF352244 | MF352314 | MF352372 |
| <i>I. pugio viridissima</i> <b>ssp. nov.</b>                          | Myanmar: Bilin River                                          | RMBH biv_371_3   | MK372428 | n/a      | n/a      |
| <i>I. pugio viridissima</i> <b>ssp. nov.</b>                          | Myanmar: Bilin River                                          | RMBH biv_375_1   | MK372429 | n/a      | n/a      |
| <i>I. pugio viridissima</i> <b>ssp. nov.</b>                          | Myanmar: Bilin River                                          | RMBH biv_375_2   | MK372430 | n/a      | n/a      |
| <i>I. pugio viridissima</i> <b>ssp. nov.</b>                          | Myanmar: Moeyungyi Lake, Sittaung Basin                       | RMBH biv_377_2   | MK372432 | n/a      | n/a      |
| <i>I. pugio viridissima</i> <b>ssp. nov.</b>                          | Myanmar: Moeyungyi Lake, Sittaung Basin                       | RMBH biv_377_3   | MK372433 | n/a      | n/a      |
| <i>I. pugio viridissima</i> <b>ssp. nov.</b>                          | Myanmar: Bago River                                           | RMBH biv_381_3   | MK372434 | n/a      | n/a      |
| <i>I. pugio viridissima</i> <b>ssp. nov.</b>                          | Myanmar: Bago River                                           | RMBH biv_381_4   | MK372435 | n/a      | n/a      |

| Species                                                                                     | Locality                                        | Specimen Voucher | COI      | 16S rRNA | 28S rRNA |
|---------------------------------------------------------------------------------------------|-------------------------------------------------|------------------|----------|----------|----------|
| <i>I. pugio viridissima</i> <b>ssp. nov.</b>                                                | Myanmar: Moe Lut Stream, Bago Basin             | RMBH biv_386_2   | MK372436 | n/a      | n/a      |
| <i>I. pugio daweiensis</i> <b>ssp. nov.</b>                                                 | Myanmar: Dawei River                            | RMBH biv_147_3   | KX865852 | KX865623 | KX865724 |
| <i>I. pugio daweiensis</i> <b>ssp. nov.</b>                                                 | Myanmar: Dawei River                            | RMBH biv_147_10  | KX865853 | KX865624 | KX865725 |
| <i>I. pugio daweiensis</i> <b>ssp. nov.</b>                                                 | Myanmar: Dawei River                            | RMBH biv_147_18  | KX865854 | KX865625 | KX865726 |
| <i>I. pugio daweiensis</i> <b>ssp. nov.</b>                                                 | Myanmar: Dawei River                            | RMBH biv_148_4   | KX865855 | KX865626 | KX865727 |
| <i>I. pugio daweiensis</i> <b>ssp. nov.</b>                                                 | Myanmar: Dawei River                            | RMBH biv_148_7   | KX865856 | KX865627 | KX865728 |
| <i>I. pugio daweiensis</i> <b>ssp. nov.</b>                                                 | Myanmar: Dawei River                            | RMBH biv_148_15  | KX865857 | KX865628 | KX865729 |
| <i>I. pugio daweiensis</i> <b>ssp. nov.</b>                                                 | Myanmar: Dawei River                            | RMBH biv_147_30  | MK372395 | n/a      | n/a      |
| <i>I. pugio paradoxa</i> <b>ssp. nov.</b>                                                   | Myanmar: Haungthayaw River                      | RMBH biv_361_1   | MK372420 | MK372465 | MK372496 |
| <i>I. pugio paradoxa</i> <b>ssp. nov.</b>                                                   | Myanmar: Haungthayaw River                      | RMBH biv_361_2   | MK372421 | MK372466 | MK372497 |
| <i>I. pugio paradoxa</i> <b>ssp. nov.</b>                                                   | Myanmar: Haungthayaw River                      | RMBH biv_361_3   | MK372422 | MK372467 | MK372498 |
| <i>Radiatula mouhoti</i> Vikhrev, Bolotov & Konopleva, 2017                                 | Myanmar: Sittaung River near Taungoo            | RMBH biv_248_1   | MF352234 | MF352305 | MF352363 |
| <i>R. mouhoti</i> Vikhrev, Bolotov & Konopleva, 2017                                        | Myanmar: Sittaung River near Taungoo            | RMBH biv_248_4   | MF352236 | MF352306 | MF352364 |
| <i>R. mouhoti</i> Vikhrev, Bolotov & Konopleva, 2017                                        | Myanmar: Sittaung River near Taungoo            | RMBH biv_253_1   | MF352248 | MF352317 | MF352375 |
| <i>R. mouhoti haungthayawensis</i> <b>ssp. nov.</b>                                         | Myanmar: Haungthayaw River                      | RMBH biv_360_1   | MK372417 | MK372463 | MK372493 |
| <i>R. mouhoti haungthayawensis</i> <b>ssp. nov.</b>                                         | Myanmar: Haungthayaw River                      | RMBH biv_360_2   | MK372418 | MK372464 | MK372494 |
| <i>R. mouhoti haungthayawensis</i> <b>ssp. nov.</b>                                         | Myanmar: Haungthayaw River                      | RMBH biv_360_3   | MK372419 | n/a      | MK372495 |
| <i>R. chaudhurii</i> (Preston, 1912) [= <i>R. cf. bonneaudii</i> sp.1 sensu Bolotov et al., | Myanmar: Ayeyarwady River basin, Tar Pein River | RMBH biv_260_5   | MF352266 | MF352330 | MF352390 |

| Species                                                                                           | Locality                                                              | Specimen Voucher | COI      | 16S rRNA | 28S rRNA |
|---------------------------------------------------------------------------------------------------|-----------------------------------------------------------------------|------------------|----------|----------|----------|
| 2017]                                                                                             |                                                                       |                  |          |          |          |
| <i>R. chaudhurii</i> (Preston, 1912) [= <i>R. cf. bonneaudii</i> sp.1 sensu Bolotov et al., 2017] | Myanmar: Ayeyarwady River basin, Tar Pein River                       | RMBH biv_260_10  | MF352268 | MF352332 | MF352392 |
| <i>R. chaudhurii</i> (Preston, 1912) [= <i>R. cf. bonneaudii</i> sp.1 sensu Bolotov et al., 2017] | Myanmar: Ayeyarwady River basin, Tar Pein River                       | RMBH biv_260_9   | MF352267 | MF352331 | MF352391 |
| <i>R. chaudhurii</i> (Preston, 1912) [= <i>R. cf. bonneaudii</i> sp.1 sensu Bolotov et al., 2017] | Myanmar: Ayeyarwady River basin, midstream near Tha Phan Kone village | RMBH biv_427_2   | MK372445 | n/a      | n/a      |
| <i>R. chaudhurii</i> (Preston, 1912) [= <i>R. cf. bonneaudii</i> sp.1 sensu Bolotov et al., 2017] | Myanmar: Ayeyarwady River basin, midstream near Tha Phan Kone village | RMBH biv_427_1   | MK372444 | n/a      | n/a      |
| <i>R. chaudhurii</i> (Preston, 1912) [= <i>R. cf. bonneaudii</i> sp.1 sensu Bolotov et al., 2017] | Myanmar: Ayeyarwady River basin, midstream near Thin Baw Kone village | RMBH biv_421_3   | MK372440 | MK372472 | MK372504 |
| <i>R. chaudhurii</i> (Preston, 1912) [= <i>R. cf. bonneaudii</i> sp.1 sensu Bolotov et al., 2017] | Myanmar: Ayeyarwady River basin, midstream near Thin Baw Kone village | RMBH biv_421_2   | MK372439 | MK372471 | MK372503 |
| <i>R. myitkyinae</i> (Prashad, 1930)                                                              | Myanmar: Ayeyarwady River basin, Lake Indawgyi                        | RMBH biv_107_1   | KX865838 | KX865609 | KX865710 |
| <i>R. myitkyinae</i> (Prashad, 1930)                                                              | Myanmar: Ayeyarwady River basin, Lake Indawgyi                        | RMBH biv_106_3   | KX865842 | KX865614 | KX865714 |
| <i>R. myitkyinae</i> (Prashad, 1930)                                                              | Myanmar: Ayeyarwady River basin, Lake Indawgyi                        | RMBH biv_106_2   | KX865843 | KX865613 | KX865715 |
| <i>R. chindwinensis</i> <b>sp. nov.</b>                                                           | Myanmar: Myit Tha (Manipur) River                                     | RMBH biv_345_2   | MK372405 | MK372453 | MK372483 |
| <i>R. chindwinensis</i> <b>sp. nov.</b>                                                           | Myanmar: Chindwin River                                               | RMBH biv_348_2   | MK372410 | MK372458 | MK372488 |
| <i>R. chindwinensis</i> <b>sp. nov.</b>                                                           | Myanmar: Myit Tha (Manipur) River                                     | RMBH biv_345_1   | MK372404 | MK372452 | MK372482 |
| <i>R. chindwinensis</i> <b>sp. nov.</b>                                                           | Myanmar: Nay Chin Sayar River                                         | RMBH biv_357_1   | MK372414 | MK372462 | MK372492 |
| <i>R. chindwinensis</i> <b>sp. nov.</b>                                                           | Myanmar: Nay Chin Sayar River                                         | RMBH biv_357_2   | MK372415 | n/a      | n/a      |
| <i>R. chindwinensis</i> <b>sp. nov.</b>                                                           | Myanmar: Nay Chin Sayar River                                         | RMBH biv_357_3   | MK372416 | n/a      | n/a      |
| <i>R. myitthanensis</i> <b>sp. nov.</b>                                                           | Myanmar: Myit Tha                                                     | RMBH             | MK372396 | MK372450 | MK372477 |

| Species                                                    | Locality                                                                            | Specimen Voucher  | COI      | 16S rRNA | 28S rRNA |
|------------------------------------------------------------|-------------------------------------------------------------------------------------|-------------------|----------|----------|----------|
|                                                            | (Manipur) River                                                                     | biv_337_3         |          |          |          |
| <i>R. myitthanensis</i> <b>sp. nov.</b>                    | Myanmar: Chindwin River                                                             | RMBH<br>biv_348_1 | MK372409 | MK372457 | MK372487 |
| <b>Leoparreysiini Vihrev, Bolotov &amp; Kondakov, 2017</b> |                                                                                     |                   |          |          |          |
| <i>Leoparreysia olivacea</i> (Prashad, 1930)               | Myanmar: Ayeyarwady River, 3 mi SW Pakkoku, Magway Division. 21.2963° N, 95.0198° E | UMMZ<br>304641    | KP795022 | KP795044 | KP795005 |
| <i>L. canefrii</i> Vihrev, Bolotov & Kondakov, 2017        | Myanmar: Sittaung River near Taungoo                                                | RMBH<br>biv_249   | MF352237 | MF352307 | MF352365 |
| <i>L. canefrii</i> Vihrev, Bolotov & Kondakov, 2017        | Myanmar: Sittaung River near Taungoo                                                | RMBH<br>biv_252_1 | MF352245 | MF352315 | MF352373 |
| <i>L. canefrii</i> Vihrev, Bolotov & Kondakov, 2017        | Myanmar: Sittaung River near Taungoo                                                | RMBH<br>biv_252_2 | MF352246 | MF352316 | MF352374 |
| <i>L. burmana</i> (Blanford, 1869)                         | Myanmar: Ayeyarwady River                                                           | RMBH<br>biv_424_3 | MK372443 | MK372474 | MK372506 |
| <i>L. burmana</i> (Blanford, 1869)                         | Myanmar: Ayeyarwady River                                                           | RMBH<br>biv_443_3 | MK372447 | n/a      | n/a      |
| <i>L. burmana</i> (Blanford, 1869)                         | Myanmar: Chindwin River                                                             | RMBH<br>biv_350_2 | MK372413 | MK372461 | MK372491 |
| <i>L. burmana</i> (Blanford, 1869)                         | Myanmar: Ayeyarwady River                                                           | RMBH<br>biv_424_2 | MK372442 | MK372473 | MK372505 |
| <i>L. burmana</i> (Blanford, 1869)                         | Myanmar: Ayeyarwady River                                                           | RMBH<br>biv_445_1 | MK372448 | n/a      | n/a      |
| <i>L. burmana</i> (Blanford, 1869)                         | Myanmar: Ayeyarwady River                                                           | RMBH<br>biv_419_3 | MK372438 | MK372470 | MK372502 |
| <i>L. burmana</i> (Blanford, 1869)                         | Myanmar: Chindwin River                                                             | RMBH<br>biv_350_1 | MK372412 | MK372460 | MK372490 |
| <i>L. burmana</i> (Blanford, 1869)                         | Myanmar: Ayeyarwady River                                                           | RMBH<br>biv_419_2 | MK372437 | n/a      | n/a      |
| <i>L. burmana</i> (Blanford, 1869)                         | Myanmar: Ayeyarwady River                                                           | RMBH<br>biv_424_1 | MK372441 | n/a      | n/a      |
| <i>L. tavoyensis</i> (Gould, 1843)                         | Myanmar: Dawei River                                                                | RMBH<br>biv_149   | KX230543 | KX230554 | KX230565 |
| <i>L. tavoyensis</i> (Gould, 1843)                         | Myanmar: Haungthayaw River                                                          | RMBH<br>biv_362_1 | MK372423 | n/a      | MK372499 |
| <i>L. tavoyensis</i> (Gould, 1843)                         | Myanmar: Haungthayaw River                                                          | RMBH<br>biv_362_2 | MK372424 | n/a      | n/a      |
| <i>L. tavoyensis</i> (Gould, 1843)                         | Myanmar: Haungthayaw River                                                          | RMBH<br>biv_362_3 | MK372425 | n/a      | n/a      |
| <i>L. whitteni</i> <b>sp. nov.</b>                         | Myanmar: Chindwin River                                                             | RMBH              | MK372411 | MK372459 | MK372489 |

| Species                                                        | Locality                                                               | Specimen Voucher | COI      | 16S rRNA | 28S rRNA |
|----------------------------------------------------------------|------------------------------------------------------------------------|------------------|----------|----------|----------|
|                                                                |                                                                        | biv_349          |          |          |          |
| <i>L. whitteni</i> sp. nov.                                    | Myanmar: Ayeyarwady River                                              | RMBH biv_435     | MK372446 | MK372475 | MK372507 |
| <i>L. whitteni</i> sp. nov.                                    | Myanmar: Ayeyarwady River                                              | RMBH biv_449     | MK372449 | MK372476 | MK372508 |
| <b>Coelaturini Modell, 1942</b>                                |                                                                        |                  |          |          |          |
| <i>Nitia teretiuscula</i> (Philippi, 1847)                     | Egypt                                                                  | ANSP 416305      | JN243897 | n/a      | JN243875 |
| <i>Coelatura</i> aff. <i>aegyptiaca</i> (Caillaud, 1827)       | Egypt                                                                  | ANSP 416304      | JN243894 | KP795045 | JN243872 |
| <b>RECTIDENTINAE Modell, 1942</b>                              |                                                                        |                  |          |          |          |
| <b>Contradentini Modell, 1942</b>                              |                                                                        |                  |          |          |          |
| <i>Yaukthwa nesemanni</i> (Konopleva, Vikhrev & Bolotov, 2017) | Myanmar: Sittaung River basin, Thauk Ye Kupt River                     | RMBH biv_144_14  | KX865906 | KX865663 | KX865777 |
| <i>Y. nesemanni</i> (Konopleva, Vikhrev & Bolotov, 2017)       | Myanmar: Sittaung River basin, Thauk Ye Kupt River                     | RMBH biv_144_25  | KX865907 | KX865664 | KX865778 |
| <i>Y. nesemanni</i> (Konopleva, Vikhrev & Bolotov, 2017)       | Myanmar: Sittaung River basin, Thauk Ye Kupt River                     | RMBH biv_144_19  | KX865908 | KX865665 | KX865779 |
| <i>Y. panhai</i> (Konopleva, Bolotov & Kondakov, 2017)         | Myanmar: Sittaung River basin, Kyan Hone River                         | RMBH biv_138_4   | KX865909 | KX865666 | KX865780 |
| <i>Y. panhai</i> (Konopleva, Bolotov & Kondakov, 2017)         | Myanmar: Sittaung River basin, Kyan Hone River                         | RMBH biv_138_12  | KX865913 | KX865670 | KX865784 |
| <i>Y. panhai</i> (Konopleva, Bolotov & Kondakov, 2017)         | Myanmar: Sittaung River basin, Kyan Hone River                         | RMBH biv_155_4   | KX865911 | KX865668 | KX865782 |
| <i>Y. inlenensis</i> Konopleva et al., 2019                    | Myanmar: Salween River basin, Inle Lake Channel                        | RMBH biv_114_1   | KX865915 | KX865672 | KX865786 |
| <i>Y. inlenensis</i> Konopleva et al., 2019                    | Myanmar: Salween River basin, Inle Lake Channel                        | RMBH biv_114_2   | KX865917 | KX865674 | KX865788 |
| <i>Y. inlenensis</i> Konopleva et al., 2019                    | Myanmar: Salween River basin, Mway Stream                              | RMBH biv_139_7   | KX865922 | KX865676 | KX865793 |
| <i>Y. cf. dalliana</i> (Frierson, 1913)                        | Myanmar: Ayeyarwady River basin, Nanyinhka Chaung River                | RMBH biv_111_21  | KX865890 | KX865657 | KX865761 |
| <i>Y. cf. dalliana</i> (Frierson, 1913)                        | Myanmar: Ayeyarwady River basin, Mali Hka River basin, Pan Khai stream | RMBH biv_101_5   | KX865894 | KX865659 | KX865763 |
| <i>Y. cf. dalliana</i> (Frierson, 1913)                        | Myanmar: Ayeyarwady River basin, Mali Hka River                        | RMBH             | KX865899 | KX865660 | KX865768 |

| Species                                           | Locality                                                               | Specimen Voucher  | COI      | 16S rRNA | 28S rRNA |
|---------------------------------------------------|------------------------------------------------------------------------|-------------------|----------|----------|----------|
| 1913)                                             | basin, Nam Palat River                                                 | biv_102_7         |          |          |          |
| <i>Y. elongatula</i> sp. nov.                     | Myanmar: Chindwin River                                                | RMBH biv_346_2    | MK372407 | MK372455 | MK372485 |
| <i>Y. elongatula</i> sp. nov.                     | Myanmar: Chindwin River                                                | RMBH biv_346_3    | MK372408 | MK372456 | MK372486 |
| <i>Y. elongatula</i> sp. nov.                     | Myanmar: Chindwin River                                                | RMBH biv_346_1    | MK372406 | MK372454 | MK372484 |
| <i>Y. elongatula</i> sp. nov.                     | Myanmar: Myit Tha (Manipur) River                                      | RMBH biv_344_3    | MK372403 | n/a      | n/a      |
| <i>Y. elongatula</i> sp. nov.                     | Myanmar: Myit Tha (Manipur) River                                      | RMBH biv_344_1    | MK372402 | n/a      | n/a      |
| <i>Y. elongatula</i> sp. nov.                     | Myanmar: Myit Tha (Manipur) River                                      | RMBH biv_341_3    | MK372401 | n/a      | MK372481 |
| <i>Y. elongatula</i> sp. nov.                     | Myanmar: Myit Tha (Manipur) River                                      | RMBH biv_339_3    | MK372399 | n/a      | n/a      |
| <i>Y. elongatula</i> sp. nov.                     | Myanmar: Myit Tha (Manipur) River                                      | RMBH biv_339_1    | MK372397 | n/a      | MK372478 |
| <i>Y. elongatula</i> sp. nov.                     | Myanmar: Myit Tha (Manipur) River                                      | RMBH biv_339_2    | MK372398 | n/a      | MK372479 |
| <i>Y. elongatula</i> sp. nov.                     | Myanmar: Myit Tha (Manipur) River                                      | RMBH biv_341_2    | MK372400 | MK372451 | MK372480 |
| <b>Outgroup Taxa</b>                              |                                                                        |                   |          |          |          |
| <b>MARGARITIFERIDAE Henderson, 1929</b>           |                                                                        |                   |          |          |          |
| <i>Gibbosula laosensis</i> (Lea, 1863)            | Laos: Mekong River basin, Nam Long River                               | RMBH biv 186_1    | JX497731 | KC845943 | KT343741 |
| <i>Margaritifera daturica</i> (Middendorff, 1850) | Far East of Russia: Amur River basin, Ilistaya River                   | RMBH biv 92_6     | KJ161516 | KJ943526 | KT343747 |
| <i>M. margaritifera</i> (Linnaeus, 1758)          | Northwestern Russia: Onega River basin, Somba River                    | RMBH biv 618      | KX550089 | KX550091 | KX550093 |
| <i>M. laevis</i> (Haas, 1910)                     | Far East of Russia: Kurile Archipelago, Kunashir Island, Sennaya River | RMBH biv d0036/22 | KJ161500 | KJ943523 | KT343742 |
| <i>M. middendorffi</i> (Rosén, 1926)              | Far East of Russia: Kamchatka, Bolshaya River basin, Nachilova River   | RMBH biv d0099/6  | KJ161547 | KJ943528 | KT343745 |
| <b>IRIDINIDAE Swainson, 1840</b>                  |                                                                        |                   |          |          |          |
| <i>Aspatharia pfeifferiana</i> (Bernardi, 1860)   | Zambia: Chambeshi River                                                | BIVAToL-330       | KC429107 | KC429264 | n/a      |
| <i>Chambardia wahlbergi</i> (Krauss, 1848)        | Zambia: Zambezi River                                                  | ANSP 419403       | JN243886 | KP184845 | JN243864 |

| Species                                                      | Locality                                                  | Specimen Voucher | COI      | 16S rRNA | 28S rRNA |
|--------------------------------------------------------------|-----------------------------------------------------------|------------------|----------|----------|----------|
| <b>ETHERIIDAE Deshayes, 1832</b>                             |                                                           |                  |          |          |          |
| <i>Etheria elliptica</i> Lamarck, 1807                       | Zambia: Chambeshi River                                   | FMNH 343390      | KP184897 | KP184847 | KP184873 |
| <b>MYCETOPODIDAE Gray, 1840</b>                              |                                                           |                  |          |          |          |
| <i>Anodontites elongata</i> (Swainson, 1823)                 | Peru                                                      | FMNH 343931      | KP184896 | KP184846 | KP184872 |
| <b>HYRIIDAE Swainson, 1840</b>                               |                                                           |                  |          |          |          |
| <i>Triplodon corrugatus</i> (Lamarck, 1819)                  | Peru                                                      | ANSP 416338      | JN243890 | KP184851 | JN243868 |
| <i>Castalia ambigua</i> Lamarck, 1819                        | Peru                                                      | ANSP 416341      | JN243889 | KP184848 | JN243867 |
| <i>Microdontia anodontaeformis</i> (Tapparone Canefri, 1883) | Guyana                                                    | UMMZ 304509      | KP184909 | KP184861 | KP184885 |
| <i>Alathyria jacksoni</i> Iredale, 1934                      | New Guinea                                                | UMMZ 304512      | KP184912 | KP184864 | KP184888 |
| <i>A. pertexta</i> Iredale, 1934                             | Australia: New South Wales                                | UMMZ 304510      | KP184910 | KP184862 | KP184886 |
| <i>A. profuga</i> (Gould, 1850)                              | Australia: Queensland                                     | UMMZ 304513      | KP184913 | KP184865 | KP184889 |
| <i>Lortiella froggatti</i> Iredale, 1934*                    | Australia: New South Wales                                | n/a              | AF231746 | KP184867 | KP184891 |
| <i>Velesunio ambiguus</i> (Philippi, 1847)                   | Western Australia                                         | FMNH 337195      | KP184915 | KP184868 | KP184892 |
| <b>TRIGONIIDAE Lamarck, 1819</b>                             |                                                           |                  |          |          |          |
| <i>Neotrigonia margaritacea</i> (Lamarck, 1804)*             | Tasmania and Australia                                    | n/a              | U56850   | DQ280034 | DQ279963 |
| <i>N. lamarckii</i> (Gray, 1838)                             | Australia: Coral Sea, North Stradbroke Island, Queensland | BIVAToL-97       | KC429105 | KC429262 | KC429443 |

\*Chimeric sequences.



**Supplementary Table 2.** Models of sequence evolution for each partition based on Bayesian information criterion (BIC) of jModelTest 2<sup>1,2</sup> and IQ-TREE<sup>3,4</sup>

| Partition               | Model by jModelTest 2 | Model by IQ-TREE |
|-------------------------|-----------------------|------------------|
| <i>COI</i>              |                       |                  |
| 1st codon of <i>COI</i> | TPM1uf                | K3Pu+G           |
| 2nd codon of <i>COI</i> | TPM3uf+G              | TPM3u+G          |
| 3rd codon of <i>COI</i> | TrN+I+G               | TN+I+G           |
| <i>28S rRNA</i>         | TIM3+I+G              | TIM3+I+G         |
| <i>16S rRNA</i>         | TIM2+G                | TIM2+I+G         |

## Supplementary References

1. Darriba, D., Taboada, G. L., Doallo, R. & Posada, D. jModelTest 2: more models, new heuristics and parallel computing. *Nature Methods* **9**, 772; DOI: [10.1038/nmeth.2109](https://doi.org/10.1038/nmeth.2109) (2012).
2. Guindon, S. & Gascuel, O. A simple, fast and accurate method to estimate large phylogenies by maximum-likelihood. *Systematic Biology* **52**, 696–704; DOI: [10.1080/10635150390235520](https://doi.org/10.1080/10635150390235520) (2003).
3. Trifinopoulos, J., Nguyen, L. T., von Haeseler, A. & Minh, B. Q. W-IQ-TREE: a fast online phylogenetic tool for maximum likelihood analysis. *Nucleic Acids Research* **44**, W232–W235; DOI: [10.1093/nar/gkw256](https://doi.org/10.1093/nar/gkw256) (2016).
4. Kalyaanamoorthy, S., Minh, B. Q., Wong, T.K.F, von Haeseler, A. & Jermiin, L. S. ModelFinder: Fast model selection for accurate phylogenetic estimates. *Nature Methods* **14**, 587–589; DOI: [10.1038/nmeth.4285](https://doi.org/10.1038/nmeth.4285) (2017).
